# Supplementary material
Source: publisher site journal article supplement (https://www.degruyterbrill.com/publication/isbn/9783110445725/downloadAsset/9783110445725_Errata.pdf)
Supplement: Supplementary file 1 [file 9783110445725_Errata.pdf]

S. 1, 2. Absatz, letzte Zeile, „Sprungverteilung“ → „Sprungwahrscheinlichkeit“: → „... oder bei sehr unsymmetrischer Sprungwahrscheinlichkeit durch die Poissonverteilung angenähert werden kann.“

S. 2, 3. Absatz, 1. und 3. Zeile, „Teil III“ → „Band V“: → „In der Physik kleinster Teilchen, der Quantenphysik (Band V, Kapitel „Quantenoptik“, Kapitel „Atomphysik“ und Kapitel „Subatomare Physik“), ergeben die Unbestimmtheitsrelationen (Band V, Kapitel „Quantenoptik“, Abschnitt 1.6.5), dass ...“

S. 4, 11. Zeile, „wahrscheinliche“ ist zu streichen: → „... d.h. wenn die Zahl der Systeme des Ensembles, die in einem bestimmten Zustand sind, zu jeder Zeit gleich groß ist.“

S. 8, 5. Zeile vom Ende des blauen Kastens, Einfügung „ohne Wiederholung“ nach „Klasse  $m$ “ und nach „Anordnung: → „Für die Zahl der *Kombinationen* von  $n$  Elementen zur Klasse  $m$  ohne Wiederholung, also zu je  $m$  Elementen ohne Berücksichtigung der Anordnung und ohne Wiederholung gilt ...“

S. 9, 4. Zeile von unten, „der Teilchen“ → „des Teilchens“: → „Wir kennen also jetzt die Wahrscheinlichkeit für eine bestimmte Sprungzahl  $n_1$  des Teilchens nach rechts bei insgesamt  $N$  Sprüngen.“

S. 28, Abb. VI-1.2, Bezeichnung „ $n_1$ “ der Abszissenachse fehlt.

S. 35, 2. Absatz, 6. Zeile, statt „*kontinuierlich Funktion*“ → „*stetige Funktion* von  $E$ “: → „Für eine sehr große Teilchenzahl kann  $\Omega(E)$  als *stetige Funktion* von  $E$  angesehen und nach Potenzen von  $\delta E$  entwickelt werden.“

S. 44, 1. Zeile, Verbesserung von „ $\chi(E) = \frac{d\Phi}{dE} \delta E \propto \frac{d\Phi}{dE}$ “ auf „ $\chi(E) \propto \frac{\Omega(E)}{V^N} = \frac{1}{V^N} \frac{d\Phi}{dE} \delta E \propto \frac{d\Phi}{dE}$ “ und statt „(Gl. VI-1.91)“ → „(Gl. VI-1.94)“:

→ „Mit  $\chi(E) \propto \frac{\Omega(E)}{V^N} = \frac{1}{V^N} \frac{d\Phi}{dE} \delta E \propto \frac{d\Phi}{dE}$  gilt daher (Gl. VI-1.94)“

S. 59, letzte Zeile, statt  $dE = P \cdot dV \rightarrow dE = -P \cdot dV$  und statt  $\left. \frac{\partial E}{\partial V} \right|_P = P \rightarrow \left. \frac{\partial E}{\partial V} \right|_P = -P$ : → „So

gilt z.B. mit  $dE = -P \cdot dV$ :  $\left. \frac{\partial E}{\partial V} \right|_P = -P$ , das gibt mit Gl. (VI-1.137)  $x_i = V$ ,  $X_i = P$  ...“

S. 59, Fußnote 49, 3. Zeile, in der Formel fehlt rechts vom Gleichheitszeichen im Zähler beim Subtrahenden das  $\ln$ -Zeichen: → 
$$\frac{\partial \ln \Omega(E, x)}{\partial x_1} = \frac{\ln \Omega(E, x_1 + dx_1, x_2, \dots, x_n) - \ln \Omega(E, x_1, x_2, \dots, x_n)}{dx_1}$$

S. 60, Beispiel, 8. Zeile, Abschnitt 2.5 → Abschnitt 1.2.5: „... ergibt sich wie früher gezeigt (Abschnitt 1.2.5): ...“

S. 64, Unterabschnitt „Berechnung von Mittelwerten für kanonische Ensembles“, 1. und letzte (4.) Zeile,  $A \rightarrow A_1$

S. 64, Beispiel, vorletzte und letzte Zeile (letzter Satz): → „Die Energieskala ist in willkürliche Einheiten geteilt, die Zahl der Zustände des großen, makroskopischen Systems steigt sehr stark mit der Energie an.“

S.69, Beispiel, 2. und 3. Formelzeile und Zeile danach (5. Zeile von unten), Verbesserung von

$$\sum_{\varepsilon_{ir}} e^{-\beta \varepsilon_{ir}} = \sum_{r_i} e^{-\beta(r_i + \frac{1}{2})h\nu_i} = e^{-\beta \frac{\varepsilon_{0i}}{2}} \cdot \sum_{n=0}^{\infty} e^{-\beta r_i h\nu_i} \stackrel{\text{Summenformel}}{=} e^{-\beta \varepsilon_{0i}} \cdot \frac{e^{-\beta h\nu_i}}{1 - e^{-\beta h\nu_i}} = e^{-3\beta \varepsilon_{0i}} \cdot \frac{1}{1 - e^{-\beta h\nu_i}}$$

auf 
$$\sum_{\varepsilon_{ir}} e^{-\beta \varepsilon_{ir}} = \sum_{r_i} e^{-\beta(r_i + \frac{1}{2})h\nu_i} = e^{-\beta \frac{\varepsilon_{0i}}{2}} \cdot \sum_{n=0}^{\infty} e^{-\beta r_i h\nu_i} \stackrel{\text{Summenformel}}{=} e^{-\beta \varepsilon_{0i}} \cdot \frac{1}{1 - e^{-\beta h\nu_i}},$$

von 
$$Z = e^{-3\beta(\varepsilon_{01} + \varepsilon_{02} + \dots + \varepsilon_{0N})} \cdot \frac{1}{1 - e^{-\beta h\nu_1}} \cdot \frac{1}{1 - e^{-\beta h\nu_2}} \cdot \dots \cdot \frac{1}{1 - e^{-\beta h\nu_N}}$$

auf 
$$Z = e^{-\beta(\varepsilon_{01} + \varepsilon_{02} + \dots + \varepsilon_{0N})} \cdot \frac{1}{1 - e^{-\beta h\nu_1}} \cdot \frac{1}{1 - e^{-\beta h\nu_2}} \cdot \dots \cdot \frac{1}{1 - e^{-\beta h\nu_N}}$$

und von „und mit  $E_0 = 3(\varepsilon_{01} + \varepsilon_{02} + \dots + \varepsilon_{0n})$ “

auf „und mit  $E_0 = \varepsilon_{01} + \varepsilon_{02} + \dots + \varepsilon_{0n}$ “

S. 75, Gln. VI-1.180 und VI-1.181, Druckfehler im Exponenten,  $e^{-\beta(E_r - \mu E_r)} \rightarrow e^{-\beta(E_r - \mu N_r)}$ :

$$\rightarrow P_r(E_r, N_r) = C' \Omega_2(E^* - E_r, N^* - N_r) = C' \Omega_2(E^*, N^*) \cdot e^{-\beta(E_r - \mu N_r)} = C \cdot e^{-\beta(E_r - \mu N_r)} \quad (\text{VI-1.180})$$

$$\rightarrow C = \frac{1}{\sum_r e^{-\beta(E_r - \mu N_r)}} \quad (\text{VI-1.181})$$

S. 84, Unterabschnitt „Bezeichnungen“, 7. Zeile, der Hochindex von  $n_r$  ist  $S_z$  ( $S$  ... Großbuchstabe):

→ Anzahl der Teilchen im Zustand  $r$ ,  $S_z$ :  $n_r^{S_z}$ ;

S. 84, Unterabschnitt „Bezeichnungen“, 14. Zeile,  $n_2^{S_{z1}} \rightarrow n_2^{S_{z2}}$ : → „... das ist die Gesamtenergie des Gases im Zustand  $R$ , bei dem  $n_1^{S_{z1}}$  Teilchen im Zustand  $r = 1$ ,  $S_{z1}$ ,  $n_2^{S_{z2}}$  Teilchen im Zustand  $r = 2$ ,  $S_{z2}$  usw., sind.“

S. 97, Fußnote 81, 4. Zeile, Verweis in der Klammer statt Gl. VI-1.177 → Gl. VI-1.184: → „... (siehe Abschnitt 1.3.5, Gl. VI-1.184) ...“

S. 97, Fußnote 81, letzte Zeile nach dem letzten Gleichheitszeichen, im Nenner Vorzeichenwechsel im

Exponenten  $e^{-\beta(\varepsilon_s - \mu)} \rightarrow e^{\beta(\varepsilon_s - \mu)}$ :  $\rightarrow \bar{n}_s = kT \frac{\partial}{\partial \mu} \ln Y_s = \frac{e^{-\beta(\varepsilon_s - \mu)}}{1 - e^{-\beta(\varepsilon_s - \mu)}} = \frac{1}{e^{\beta(\varepsilon_s - \mu)} - 1}$

S. 99, Abb. VI-1.15, rechter Abbildungsteil, rechts vom Schnittpunkt der Koordinatenachsen fehlt der Wert „0“ auf der Temperaturachse.

S. 108, Punkt 7 „Thermische Wechselwirkung zweier Systeme“, 2. Zeile, partielles Ableitungszeichen vor „ $\ln \Omega$ “ fehlt, statt „ $T = \frac{\partial E}{k \ln \Omega}$ “  $\rightarrow$  „ $T = \frac{\partial E}{k \partial \ln \Omega}$ “:  $\rightarrow$  „... dass in beiden Systemen gleiche

Temperatur  $T = \frac{\partial E}{k \partial \ln \Omega}$  herrscht ...“

S. 108, Punkt 8, 2. Zeile, nach der Klammer fehlt „als Nullpunkt“:  $\rightarrow$  „Durch die Festlegung der thermodynamischen Temperaturskala mit dem Tripelpunkt von  $\text{H}_2\text{O}$  ( $T_3 = 273,16 \text{ K}$ ) als Nullpunkt und ...“

S. 110, Punkt 16, 4. Zeile (2. Zeile nach dem 1. blauen Feld), nach „ergibt sich“ fehlt „für Photonen“: „Damit ergibt sich für Photonen die Planck-Verteilung ...“

S. 117, Gl. VI-1.269, nach dem 1. Gleichheitszeichen fehlt im Zähler im 2. Faktor bei  $\hbar$  ein

Quadratzeichen:  $\rightarrow \lambda_T^3 = \frac{(2\pi)^{3/2} (2\pi\hbar^2)^{3/2}}{3^{3/2} (mkT)^{3/2}} = \left(\frac{2\pi}{3}\right)^{3/2} \cdot \frac{1}{n_Q} = \frac{3,03}{n_Q} \cong \frac{1}{n_Q}$

S. 119, Beispiel, 1. Zeile, über  $n_{\text{He}}$  fehlt der Mittelwertstrich:  $\rightarrow \bar{n}_{\text{He}} \ll n_{Q,\text{He}}$

S. 137, Abb. VI-2.8, Bildunterschrift, nach „antisymmetrischen Raumanteil“ fehlt „( $\psi_a$ )“:  $\rightarrow$  „Schematische Darstellung der potenziellen Energie zweier Atome  $A$  und  $B$  als Funktion ihres Abstands  $r_{AB}$  für einen symmetrischen ( $\psi_s$ ) und einen antisymmetrischen Raumanteil ( $\psi_a$ ) der Wellenfunktion.“

S. 138, Abb. VI-2.9, Zeichnungsbeschriftung, bei den Dipolmomenten  $\bar{p}_1$  und  $\bar{p}_2$  fehlt der Index „e“ für elektrisch:  $\rightarrow$  „Dipolmoment  $\bar{p}_{e1}$ “ und „Dipolmoment  $\bar{p}_{e2}$ “

S. 142, Abschnitt 2.1.2.1. 10. Zeile nach Gl. (VI-216): „p-orbitalen“  $\rightarrow$  „p-Orbitalen“ (Großbuchstabe bei „Orbitalen“)

S. 146, 1. Zeile, Textänderung auf:  $\rightarrow$  „Für die gesamte  $WW$ -Energie aller  $N$  Ionenpaare (gesamte Gitterenergie) ergibt sich unter Einführung der *Madelung-Konstante*  $\alpha$ :“

S. 148, 13. Zeile (3. Zeile von Punkt 2), in der Klammer statt „Gl. VI-2.313“  $\rightarrow$  „Gl. VI-2.314“:  $\rightarrow$  „Der Kompressionsmodul  $K$  kann als Funktion der Madelungkonstante  $\alpha$  und der Reichweite  $b$  des Born-Mayer-Potenzials angegeben werden (siehe Anhang 1, Gl. VI-2.314):“

S. 148, Tabelle, 2. Spalte, letzte Zeile, „ $\text{O}^-$ “  $\rightarrow$  „ $\text{O}^{--}$ “:  $\rightarrow$  „ $\text{Mg}^{2+}$ ,  $\text{O}^{--}$ “

S. 151, Fußnote 19, 2. Zeile, es fehlt der Basisvektor  $\bar{c}'$ :  $\rightarrow$  „Wird das Translationsgitter von anderen Basisvektoren  $\bar{a}', \bar{b}', \bar{c}'$  aufgespannt, ...“

S. 153, Abb. VI-2.19, Bildunterschrift, Ergänzung des ersten Satzes um „für ein ebenes Punktegitter“:  $\rightarrow$  „Konstruktion der Wigner-Seitz-Zelle für ein ebenes Punktegitter: ...“

S. 154 Abb. VI-2.20: In allen 3 Bildern sollen die nicht sichtbaren Kanten fein punktiert eingezeichnet sein. Rechtes Bild: Sichtbarkeit der Geraden 4 ist zu korrigieren. In der Bildunterschrift ist statt „ $\pi$ “ 3 mal „ $2\pi$ “ zu setzen, also  $2\pi/4$ ,  $2\pi/3$ ,  $2\pi/2$ . Zusatz in der 2. Zeile der Bildunterschrift: „... und sechs 2-zählige (verbinden die Mitten diametral gegenüberliegender Seitenkanten, Drehung um  $2\pi/2$ ) ...“

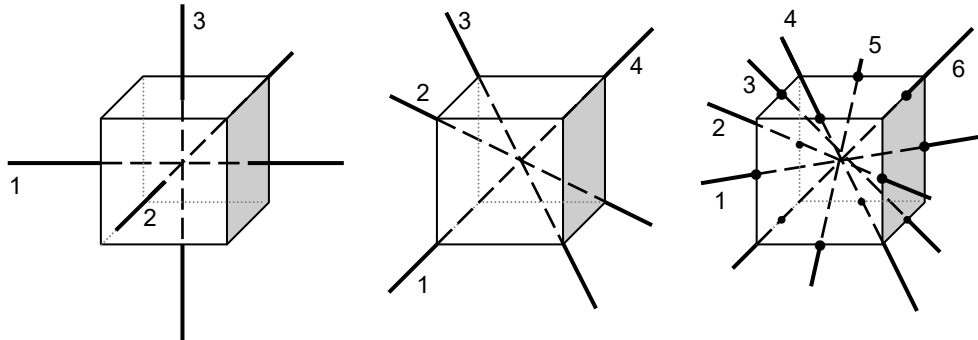

Abb. VI-2.20: Drei 4-zählige (Drehung um  $2\pi/4$ ), vier 3-zählige (Drehung um  $2\pi/3$ ) und sechs 2-zählige (verbinden die Mitten diametral gegenüberliegender Seitenkanten, Drehung um  $2\pi/2$ ) Drehachsen beim Würfel.

S. 175, Fußnote 35: „älteren“ streichen, also: „In der Literatur wird die Länge  $1 \cdot 10^{-10}$  m als Ångström-Einheit bezeichnet:  $1 \text{ Å} = 1 \cdot 10^{-10}$  m.“

S. 179, Fußnote 37: (*wiggler*)  $\rightarrow$  streichen. Es bleibt: „In einem Undulator wird die Richtung ...“

S. 183, Abb. VI-2.50, Bildunterschrift: Netzebeneschar  $\rightarrow$  Netzebenenenschar (n ist einzufügen)

S. 184, 1. Zeile, „Phasendifferenz“  $\rightarrow$  Wegdifferenz“:  $\rightarrow$  „Daraus ergibt sich die Wegdifferenz der beiden Teilstrahlen 1 und 2 zu“

S. 188, nach Gl. VI-2.76:  $(nh, nk, nl) \rightarrow (nh \ nk \ nl)$  (Beistriche sind zu streichen)

analog in Fußnote 48, 2. und 3. Zeile: „... (fiktiven) Ebenen  $(nh \ nk \ nl)$  ...“ und  $n = \frac{d_{hkl}}{d_{nh \ nk \ nl}}$

S. 192, 1. Textzeile nach Abb. VI-2.54, „ $\vec{k}' = \vec{k}$ “  $\rightarrow$  „ $|\vec{k}'| = |\vec{k}|$ “: „Für den hier diskutierten Fall der *elastischen Streuung* gilt  $|\vec{k}'| = |\vec{k}|$ , d. h., ...“

S. 193 letzter Satz zur Laue-Methode: Textänderung: „... die gleiche Symmetrie (abgesehen von der Inversions-Symmetrie).“

S. 196, Abb. VI-2.57, Beschriftungsänderung in der Abbildung:

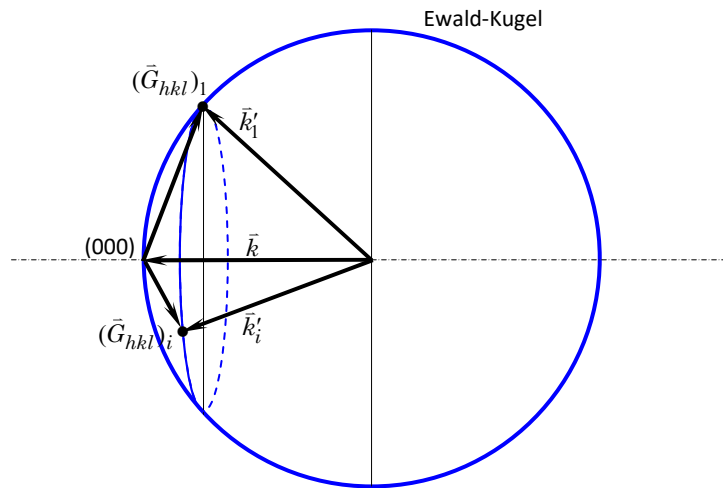

S. 197, 1. Zeile, Druckfehler, „einr“ → „eine“: → “Abb. VI-2.59 zeigt eine Debye-Scherrer-Kamera für die Röntgenstrukturanalyse von Kristallpulvern:“

S. 198, Abschnitt 2.2.6.1, 2. Absatz, 4. Zeile, „vom Schottky-Typ“ ist zu streichen, „einer“ und (nächste Zeile in der Klammer) „ein“ sind kursiv zu stellen: → “Zur Erzeugung *einer* LS in Metallen (*ein* Gitteratom wird an die Oberfläche befördert) ist eine Energie von ca. 1 eV erforderlich.“

S. 200, 2. Zeile, Druckfehler, „mehrfach MZGA“ → „Mehrfach-ZGA“

S. 201, Beispiel, Gleichungen in den Zeilen 8 und 10, Ableitungen an den Stellen „ $x = 0$ “, nicht bei

„ $\tau = 0$ “: →  $\left. \frac{d\tau}{dx} \right|_{x=0} = \frac{G}{d}$  und  $\left. \frac{d\tau}{dx} \right|_{x=0} = \tau_c \cdot \frac{2\pi}{b} \cdot \cos \frac{2\pi x}{b} \Big|_{x=0} = \tau_c \cdot \frac{2\pi}{b}$

S. 212, Abb. VI-2.69: Beschriftung der Ordinate (y-Achse):  $C_V, C_P$  statt nur  $C_V$ : →  $C_V, C_P$  [J·mol<sup>-1</sup>·K<sup>-1</sup>]

S. 215, 1. Zeile nach Gl. VI-2.110: „d.h.“ → „somit“

S. 216, Abb. VI-2.71, Bildunterschrift, 1. Zeile, bei „Volumen“ fehlt der Bindestrich „Volumen-“: → Zahl der Eigenfrequenzen pro Volumen- und Frequenzeinheit ...“

S. 216, 2. Textzeile nach Abb. VI-2.71, „Volumen“ → „Volumeneinheit“: → “... ist die Gesamtzahl der Eigenfrequenzen pro Volumeneinheit  $z_\omega(\omega)d\omega$  im Frequenzintervall  $d\omega$  ...“

S. 220, Textzeile nach Gl. VI-2.120, statt „Intervall  $\omega$ “ → „Intervall  $d\omega$ “: → „Die Anzahl der Schwingungen im Intervall  $d\omega$  wächst also mit  $\omega^2$  (Abb. VI-2.73)!“

S. 227, Beispiel, letzte Gleichung: Der Satzpunkt nach  $kN_A$  ist zu streichen, „ $kN_A$ “ statt „ $kN_A$ “: →

$$C_{V,el,Cu,RT}^{(m)} \cong \frac{3}{2} kN_A \cdot \left( \frac{293}{81.000} \right) \approx 0,0054 R = 0,045 \text{ J/mol K}$$

S. 228, Abb. VI-2.75, Beschriftung der Ordinatenachse, bei der Einheit fehlt bei „K“ für Kelvin das Quadrat: →  $C^{(m)}/T$  [mJ/(mol·K<sup>2</sup>)]

S. 230, Einrückung nach Phononen, 2. Zeile: „... für die Frequenz  $\Omega = v_S \cdot q$ , wobei ...“ (ein  $\Omega$  ist zu streichen): → „Dabei gilt für die Frequenz  $\Omega = v_S \cdot q$ , wobei ...“

S.236, 1. Zeile, „außerdem“ ist zu streichen:  $\rightarrow$  „ $k' \cong k$  bedeutet praktisch elastische Streuung, bei der der Energieverlust der Photonen  $\hbar\Omega$  sehr klein ist.“

S. 237, Beispiel, 2. Gleichung, vor dem  $\cong$ -Zeichen fehlt die Einheit „ $\text{m}^{-1}$ “:  $\rightarrow$

$$q = \frac{\Omega}{v_s} = \frac{2 \cdot 10^{11}}{5 \cdot 10^3} = 4 \cdot 10^7 \text{ m}^{-1} \cong k$$

S. 238, Abb. VI-2.78: Beschriftung im Bild, oben, 2. Zeile: „ $\ln(\hbar C)$ “  $\rightarrow$  „ $\ln(\hbar c)$ “ ( $c$  Kleinbuchstabe):  $\rightarrow$  „ $\ln E_\gamma = \ln k + \ln(\hbar c)$ “

S. 239, Abb. VI-2.79: Die Spitze des von links oben nach rechts unten verlaufenden Pfeils  $\vec{k}_{0,N}$  muss genau im nahe benachbarten Schnittpunkt der Gitternetzlinien enden. Entsprechend sind die 3 dort beginnenden Pfeile ( $\vec{G}_1, \vec{G}_2$  und  $\vec{G}_3$ ) und der Teilkreis zu verändern.

S. 240, 2. Zeile, Verbesserung, „eine“  $\rightarrow$  „die gleiche“:  $\rightarrow$  „..., da jede Funktion  $\Omega(\vec{q})$  für elastische Schwingungen des Kristallgitters die gleiche periodische Funktion ...“

S. 240, 5. Zeile nach Gl. VI-2.165, Vektorzeichen über „ $q$ “ fehlt:  $\rightarrow$  „... die Frequenz (Energie) der Phononen  $\Omega(\vec{q})$  in Abhängigkeit von  $\vec{q}$ , ...“

S. 243, Beispiel, Gleichung in der 1. Zeile, Einheiten fehlen:  $\rightarrow$

$$\frac{\Delta E_n}{E_n} = \frac{E_n - E'_n}{E_n} = \frac{\hbar\Omega}{E_n} = \frac{20 \text{ meV}}{80 \text{ meV}} = 0,25$$

S. 245, nach Gl. VI-2.172, Ergänzung noch vor dem Satzpunkt, „mit  $q = \frac{2\pi}{\lambda}$ “:  $\rightarrow$

$$u(na, t) = u_0 e^{i(\Omega t - qna)}, \quad \text{mit } q = \frac{2\pi}{\lambda}. \quad (\text{VI-2.172})$$

S. 251, Beispiel, letzte Zeile, in der ersten Gleichung  $k_{\max} \rightarrow q_{\max} : \rightarrow v_s = \frac{\omega_D}{q_{\max}} = \frac{\omega_D \cdot a}{\pi}$

S. 256, Gln. VI-2.202 bis VI-2.205, kein Grenzübergang „ $q \rightarrow 0$ “, sondern nur Grenzfall kleiner  $q$ -Werte, also „ $q \approx 0$ “:

$$\begin{aligned} \Omega_-^2(q \approx 0) &= \frac{f}{M \cdot m} \{M + m - (M + m) \sqrt{1 - \frac{4Mm}{(M + m)^2} \sin^2 qa}\} = \\ &= \frac{f}{M \cdot m} \{M + m - (M + m) (1 - \frac{2Mm}{(M + m)^2} \sin^2 qa)\} = \\ &= \frac{f}{M \cdot m} \frac{2Mm}{M + m} \sin^2 qa = \frac{2f}{M + m} \sin^2 qa \end{aligned} \quad (\text{VI-2.202})$$

$$\Rightarrow \Omega_-(q \approx 0) = \sqrt{\frac{2f}{M + m}} \sin qa \cong \sqrt{\frac{2f}{M + m}} \cdot qa \quad (\text{VI-2.203}).$$

$$\begin{aligned}
\Omega_+^2(q \approx 0) &= \frac{f}{M \cdot m} \{M + m + (M + m) \sqrt{1 - \frac{4Mm}{(M + m)^2} \sin^2 qa}\} = \\
&= \frac{f}{M \cdot m} \{M + m + (M + m) (1 - \frac{2Mm}{(M + m)^2} \sin^2 qa)\} = \\
&= 2f \frac{M + m}{M \cdot m} - f \frac{2}{M + m} \sin^2 qa \cong 2f \frac{M + m}{M \cdot m}
\end{aligned}
\tag{VI-2.204}$$

$$\Rightarrow \quad \Omega_+(q \approx 0) = \sqrt{2f \frac{M + m}{M \cdot m}} \tag{VI-2.205}.$$

S. 259, Abschnitt 2.5.3, 8. Zeile, letztes Wort „gerade“ ist zu streichen:  $\rightarrow$  „Damit ergeben sich  $N$  Werte für  $\bar{q}$ , bzw.  $3N$  Werte für die drei Komponenten der  $\bar{q}$  .

S. 260, Abb. VI-2.95, Ende der Bildunterschrift, Zitatänderung: *Physical Review* **B 48**, 15707 (2004)  $\rightarrow$  *Physical Review* **B 69**, 024304 (2004)

S. 261, letzte Zeile vor Abschnitt 2.5.4, statt „ $-\frac{\pi}{a} < q \leq \frac{\pi}{a}$ “  $\rightarrow$  „der 1. BZ“:  $\rightarrow$  „... sind alle Funktionen der Wellenzahl  $\bar{q}$  innerhalb der Grenzen der 1. BZ.“

S. 262, Abb. VI-2.96:

1. Achsenbeschriftung der Ordinatenachse, Kleinbuchstabe bei  $Z_v(\nu)$ : statt  $Z_v(\nu) \rightarrow z_v(\nu)$
2. analog in der 1. Zeile der Bildunterschrift, Kleinbuchstabe bei  $Z_v(\nu)$ : statt  $Z_v(\nu) \rightarrow z_v(\nu)$
3. Ende der Bildunterschrift, Zitatänderung: *Physical Review* **B 48**, 15707 (2004)  $\rightarrow$  *Physical Review* **B 69**, 024304 (2004)

S. 266, letzte Zeile vor Gl. VI-2.217, Erweiterung unmittelbar vor der Fußnotennummer 89:  $\rightarrow$  „... einer eher groben Abschätzung unter der Annahme, dass die Relaxationszeiten der elektrischen und der thermischen Leitfähigkeit gleich sind<sup>89</sup>“

S. 268, Beispiel, letzte Gleichung, 2.-Zeile (also nach dem 4. Gleichheitszeichen):  $\langle v_x \rangle \rightarrow \langle v \rangle$ , also:

$$\begin{aligned}
\frac{|Q|}{t} &= \Delta U \cdot \varphi = c_{V1} \cdot \lambda_{Sto\beta} \cdot \frac{dT}{dx} \cdot n \langle v_x \rangle = \underbrace{c_{V1} \cdot n}_{c_{vel}} \cdot \lambda_{Sto\beta} \cdot \frac{\langle v \rangle}{3} \cdot \frac{dT}{dx} = \\
&= \frac{\lambda_{Sto\beta}}{3} \langle v \rangle c_{vel} \frac{dT}{dx} = \Lambda \frac{dT}{dx}
\end{aligned}$$

S. 272, Gl. VI-2.231: am Ende der Gleichung fehlt „ $dE$ “

$$\text{also: } Z(E)dE = \frac{\pi(2m_e)^{\frac{3}{2}}}{2\hbar^3} E^{\frac{1}{2}} dE \cdot \frac{\ell^3}{\pi^3} = \frac{V}{2\pi^2\hbar^3} (2m_e)^{\frac{3}{2}} E^{\frac{1}{2}} dE = C \cdot E^{\frac{1}{2}} dE$$

S. 273, Formel für „ $C$ “ unmittelbar nach Gl. VI-2.232, im Zähler rechts fehlt „ $V$ “: also statt

$$C = \frac{1}{2\pi^2\hbar^3} (2m_e)^{\frac{3}{2}} \rightarrow C = \frac{V}{2\pi^2\hbar^3} (2m_e)^{\frac{3}{2}}$$

S. 274, Abb. VI-2.99, Bildunterschrift: statt „Zahl der Zustände...“  $\rightarrow$  „Mögliche Zustände ...“

S. 275, Text nach Gl. VI-2.233: „ $E < \varepsilon_F$ “  $\rightarrow$  „ $E \leq \varepsilon_F$ “:  $\rightarrow$  Bei  $T = 0$  ist  $F(E, 0) = 1$  für  $E \leq \varepsilon_F$  und  $F(E, 0) = 0$  für  $E > \varepsilon_F$ .

S. 275, vorletzte Zeile vor Abschnitt 2.6.1.2.4, Erweiterung „Die Fermienergie der Elektronen...“: → „Die Fermienergie der Elektronen hängt also nur von der Konzentration der freien Elektronen  $n_e = N_e/V$  ab.“

S. 278, letzte Zeile, „indem“ → „in dem“: → „... Potenzialtopf, in dem die  $e^-$  eingesperrt sind, ...“

S. 279, erste Textzeile nach Abb. V-2.102: „mir  $E < \varepsilon_F$ “ → „mit  $E \leq \varepsilon_F$ “: → „Bei der Temperatur  $T = 0$  sind alle Energieniveaus mit  $E \leq \varepsilon_F$  besetzt.“

S. 283, vorletzte Zeile, bei der ersten Formel in der Klammer fehlt bei „ $m$ “ der Index „ $e$ “: →

$$E_S = \frac{(p_x^0)^2}{2m_e}$$

S. 283, Fußnote 101, unter dem Integral fehlt „ $dx$ “: →  $\int x \cdot e^{-cx^2} dx = -\frac{1}{2c} e^{-cx^2}$

S. 284, Gl. VI-2.251: Bei den unteren Integralgrenzen in der 1. Zeile ( $p_x^0$ ) ist die Null als oberer Index von  $p$  näher zu  $p$  zu setzen.

$$\begin{aligned} j_{Em} &= \frac{e}{m_e} \int_{p_x^0}^{\infty} p_x n(p_x) dp_x = \frac{ekT}{2\pi^2 \hbar^3} e^{\varepsilon_F/kT} \int_{p_x^0}^{\infty} p_x e^{-p_x^2/2m_e kT} dp_x = \\ &= \frac{ekT}{2\pi^2 \hbar^3} e^{\varepsilon_F/kT} \left[ -m_e kT \cdot e^{-p_x^2/2m_e kT} \right]_{p_x^0}^{\infty} = \frac{em_e k^2}{2\pi^2 \hbar^3} T^2 e^{(\varepsilon_F - E_S)/kT} = \\ &= \frac{em_e k^2}{2\pi^2 \hbar^3} T^2 e^{-\Phi/kT} = A \cdot T^2 \cdot e^{-\Phi/kT} \end{aligned}$$

S. 285, 4. Zeile von unten, letztes Wort „konstruktiv“ ist zu streichen: → „... und interferiert mit der Welle, die vom Nachbaratom in entgegengesetzter Richtung reflektiert wird.“

S. 292, Abb. VI-2.109, der Zuweisungsstrich für „ $P = 3\pi/2$ “ in der Figur gehört zur blauen Kurve, er muss etwas nach rechts verschoben werden und deutlich auf der blauen Kurve enden.

S. 295, vorletzte Zeile, „man“ ist zu streichen: → Während im Fall des freien  $e^-$  ( $P = 0$  in der Bedingungsgleichung VI-2.275) in diesem einfachen Modell die Zustandsdichte  $\rho$  konstant ist, ...“

S. 299, Textzeile vor Gl. VI-2.287), am Ende des Satzes ist einzufügen: „(und für die Relaxationszeit  $\tau$  jene der Elektronen an der Fermikante,  $\tau_F$ )“: → „... die effektive Masse  $m_e^*$  genommen wird (und für die Relaxationszeit  $\tau$  jene der Elektronen an der Fermikante,  $\tau_F$ ).“

S. 299, letzte Zeile, Einfügung „mittleren“ und Querstrich über  $m_e^*$ : → „Die Leitfähigkeit ist also

proportional zur mittleren reziproken effektiven Masse  $\frac{1}{m_e^*}$ .“

S. 304, 2. Zeile, Druckfehler, „PbSb“ → „P, Sb“: → „... eine geringe Menge von Fremdatomen mit 5 Valenz- $e^-$  (z.B. As, P, Sb) ein, ...“

S. 306, Gl. VI-2.290, ganz rechts, „ $n_x, n_x$  ganz“ → „ $n_x, n_y$  ganz“



S. 311, Textzeile nach Gl. VI-2.295,  $V_{ext} \rightarrow v_{ext}$  (Kleinbuchstabe, rundes v):  $\rightarrow (v_{ext} \dots$   
Kernladungspotenzial,  $\rho(\vec{r}) \dots$  Elektronendichte) ergibt sich ...“

S. 321, Übungen, Beispiel 4, 1. Zeile, Textänderung:  $\rightarrow$  „Ein elastischer Festkörper sei einer  
Spannung (z.B. einer Zugkraft) ausgesetzt.“

S. 325, Gl. VI-2.313, nach dem 1. Gleichheitszeichen fehlt im letzten Faktor des ersten Terms bei „ $R$ “  
der Index „0“:

$$\rightarrow \left( \frac{d^2 U}{dR^2} \right)_{R=R_0} = \frac{1}{b^2} N Z \frac{\alpha q^2 b}{4\pi\epsilon_0 Z R_0^2} e^{R_0/b} e^{-R_0/b} - \frac{1}{4\pi\epsilon_0} 2N\alpha q^2 \frac{1}{R_0^3} =$$

$$= \frac{N\alpha q^2}{4\pi\epsilon_0 R_0^3} \left( \frac{R_0}{b} - 2 \right)$$

S. 327, Abb. VI-2.122, Beschriftung des blauen Pfeils, „ $E_{pot}^i$ “  $\rightarrow$  „ $E_{pot}^{Krist}$ “

S. 329, Abb. VI-2.123, Bildunterschrift,

3. Zeile, „ $x$  und  $y$ “  $\rightarrow$  „ $x^*$  und  $y^*$ “:  $\rightarrow$  „..., die Projektionen von  $\vec{A}$  auf  $x^*$  und  $y^*$  sind.“

4. Zeile: Zusatz nach  $A^x, B^y$  „bei Verwendung von  $\vec{a}$  und  $\vec{b}$  als Basisvektoren“:  $\rightarrow$  „ $A_x, A_y$  sind, wenn  
die reziproken Gittervektoren  $\vec{a}^*, \vec{b}^*$  als Basisvektoren verwendet werden, die kovarianten,  $A^x, A^y$  bei  
Verwendung von  $\vec{a}$  und  $\vec{b}$  als Basisvektoren die kontravarianten Komponenten des Vektors  $\vec{A}$ .“

S. 343, 5. Zeile nach Gl. VI-3.5, nach dem 1. Gleichheitszeichen statt „ $f^{(2)}(\vec{r}_2)$ “  $\rightarrow$  „ $f^{(1)}(\vec{r}_2)$ “:

$$f^{(2)}(\vec{r}_1, \vec{r}_2) = f^{(1)}(\vec{r}_1) f^{(1)}(\vec{r}_2) = \frac{N}{V} \cdot \frac{N-1}{V} \underset{\text{große } N}{\approx} \frac{N^2}{V^2} = \rho_0^2 = \text{const.}$$

S. 343, 2. Zeile vor Gl. VI-3.6, „ $\vec{r} = \vec{r}_1 - \vec{r}_2$ “  $\rightarrow$  „ $\vec{r}_{12} = \vec{r}_1 - \vec{r}_2$ “

S. 358, Floatglas, 2. Zeile (letzte Zeile im grauen Feld), „ $m$ “  $\rightarrow$  „ $m^2$ “ und „ $\times$ “  $\rightarrow$  Malpunkt „ $\cdot$ “:  
 $\rightarrow$  „ $6,00 \cdot 3,21 \text{ m}^2$ “.

S. 358, Abschnitt 3.1.3.2.1, 1. Zeile, „ $\pi\lambda\alpha\sigma\sigma\omega$ “  $\rightarrow$  „ $\pi\lambda\alpha\sigma\sigma\epsilon\iota\nu$ “:  $\rightarrow$  „ $\pi\lambda\alpha\sigma\sigma\epsilon\iota\nu = \text{formbar}$ “

S. 370, Abb. VI-3.24, Beschriftung in der Abbildung: „Benzoessäurerest“  $\rightarrow$  „Äthyl-Benzoessäurerest“

S. 379, Abschnitt 3.3, 6. Zeile, Druckfehler, „ $Ikosaeder$ “  $\rightarrow$  „ $Ikosaeder$ -Geometrie“:  $\rightarrow$  „... , sondern  
einer  $Ikosaeder$ -Geometrie mit einer *fünzfähigen Drehachse* (Abb. VI-3.32).“

S. 398 Fußnote 47, 6. Zeile, Textergänzung: „Der Atomstreu­faktor (bei Neutronenstreuung  
„kohärente Streulänge“ (*coherent scattering length*) genannt) ...“
